# Supplementary material
Source: Elsevier journal article supplement (https://www.sciencedirect.com/science/article/pii/S1885585717304747)
Supplement: mmc1 [file S1885585717304747:mmc1.pdf]

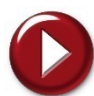

## Supplementary material

# Central Obesity is the Key Component in the Association of Metabolic Syndrome With Left Ventricular Global Longitudinal Strain Impairment

## Table 1 of the supplementary material

Comparison of Baseline Sociodemographic Characteristics Between the Random Sample and the Entire Population of the Brazilian Longitudinal Study of Adult Health (ELSA-Brasil)

|                                                 | ELSA-Brasil (N = 15 105) |      | Random sample (N = 1055) |      |
|-------------------------------------------------|--------------------------|------|--------------------------|------|
| Characteristics                                 | n                        | %    | n                        | %    |
| <i>Sex</i>                                      |                          |      |                          |      |
| Men                                             | 6887                     | 45.6 | 493                      | 46.7 |
| Women                                           | 8218                     | 54.4 | 562                      | 53.3 |
| <i>Age, y</i>                                   |                          |      |                          |      |
| 35-44                                           | 3340                     | 22.1 | 211                      | 20.0 |
| 45-54                                           | 5939                     | 39.3 | 478                      | 45.3 |
| 55-64                                           | 4234                     | 28.0 | 261                      | 24.7 |
| 65-74                                           | 1592                     | 10.6 | 105                      | 10.0 |
| <i>Self-identified skin color/race category</i> |                          |      |                          |      |
| White                                           | 7791                     | 52.2 | 528                      | 50.1 |

|                                                           |      |      |     |      |
|-----------------------------------------------------------|------|------|-----|------|
| Black                                                     | 2397 | 16.1 | 185 | 17.5 |
| Brown ('pardo')                                           | 4202 | 28.2 | 303 | 28.7 |
| Asian                                                     | 374  | 2.5  | 26  | 2.5  |
| Indigenous                                                | 157  | 1.0  | 13  | 1.2  |
| <i>Educational level</i>                                  |      |      |     |      |
| Never attended school or incomplete elementary school     | 894  | 5.9  | 58  | 5.5  |
| Complete elementary school or incomplete secondary school | 1028 | 6.8  | 60  | 5.7  |
| Complete secondary school                                 | 5233 | 34.6 | 349 | 33.1 |
| University degree                                         | 7950 | 52.7 | 588 | 55.7 |

Table 2 of the supplementary material

Quantile Regression for the Association of Metabolic Syndrome Components With Global Longitudinal Strain. Cohort  
Random Sample, the ELSA-Brasil Study (2008-2012) (N = 1055)

|                                                        | Model 1            |         | Model 2            |       | Model 3            |         | Model 4            |      |
|--------------------------------------------------------|--------------------|---------|--------------------|-------|--------------------|---------|--------------------|------|
|                                                        | Difference<br>(SE) | P       | Difference<br>(SE) | P     | Difference<br>(SE) | P       | Difference<br>(SE) | P    |
| 50th GLS Quantile                                      |                    |         |                    |       |                    |         |                    |      |
| Elevated waist circumference*                          | 0.73 (0.19)        | .0002   | 0.31 (0.19)        | .11   | 0.84 (0.19)        | < .0001 | 0.70 (0.23)        | .002 |
| Elevated glucose and/or diabetes treatment             | 0.79 (0.21)        | .0002   | 0.38 (0.22)        | .08   | -0.21 (0.18)       | .24     | -0.22 (0.19)       | .26  |
| Elevated triglycerides and/or specific medication use  | 1.05 (0.17)        | < .0001 | 0.68 (0.20)        | .0006 | 0.48 (0.22)        | .03     | 0.42 (0.21)        | .05  |
| Reduced HDL-cholesterol and/or specific medication use | -0.11 (0.26)       | .66     | -0.20 (0.17)       | .24   | -0.21 (0.20)       | .31     | -0.26 (0.21)       | .21  |
| Elevated blood pressure and/or hypertension treatment  | 0.76 (0.19)        | < .0001 | 0.43 (0.20)        | .03   | 0.23 (0.19)        | .22     | 0.18 (0.18)        | .33  |
| 75th GLS Quantile                                      |                    |         |                    |       |                    |         |                    |      |
| Elevated waist circumference*                          | 0.51 (0.21)        | .02     | 0.36 (0.23)        | .12   | 0.64 (0.22)        | .004    | 0.29 (0.25)        | .25  |
| Elevated glucose and/or diabetes treatment             | 0.73 (0.21)        | .0005   | 0.42 (0.22)        | .06   | 0.30 (0.21)        | .15     | 0.30 (0.20)        | .13  |
| Elevated triglycerides and/or specific medication use  | 0.76 (0.23)        | .0009   | 0.65 (0.23)        | .006  | 0.60 (0.20)        | .002    | 0.52 (0.22)        | .02  |

|                                                        |              |         |              |      |              |       |              |     |
|--------------------------------------------------------|--------------|---------|--------------|------|--------------|-------|--------------|-----|
| Reduced HDL-cholesterol and/or specific medication use | -0.10 (0.20) | .62     | -0.34 (0.30) | .26  | -0.35 (0.25) | .17   | -0.27 (0.22) | .22 |
| Elevated blood pressure and/or hypertension treatment  | 0.66 (0.18)  | .0003   | 0.30 (0.23)  | .19  | 0.25 (0.19)  | .19   | 0.23 (0.20)  | .26 |
| <i>95th GLS Quantile</i>                               |              |         |              |      |              |       |              |     |
| Elevated waist circumference*                          | 1.04 (0.35)  | .003    | 1.08 (0.42)  | .01  | 0.97 (0.28)  | .0005 | 0.43 (0.31)  | .16 |
| Elevated glucose and/or diabetes treatment             | 1.72 (0.33)  | < .0001 | 0.65 (0.47)  | .17  | 0.91 (0.28)  | .001  | 0.55 (0.33)  | .09 |
| Elevated triglycerides and/or specific medication use  | 0.82 (0.46)  | .07     | 0.42 (0.50)  | .41  | 0.46 (0.36)  | .21   | 0.59 (0.31)  | .06 |
| Reduced HDL-cholesterol and/or specific medication use | -0.03 (0.49) | .95     | 0.05 (0.49)  | .92  | -0.36 (0.38) | .35   | -0.31 (0.32) | .32 |
| Elevated blood pressure and/or hypertension treatment  | 0.94 (0.38)  | .01     | 1.12 (0.41)  | .007 | 0.43 (0.34)  | .21   | 0.47 (0.37)  | .21 |

GLS, global longitudinal strain; HDL, high-density lipoprotein; SE, standard error.

\*European origin cutoff waist circumference  $\geq 94$  cm for men and  $\geq 80$  cm for women.

Model 1: specific metabolic syndrome component.

Model 2: adjusted for all additional metabolic syndrome components.

Model 3: model 2 + sex, age (years), race/color, educational level, ELSA-Brasil center.

Model 4: model 3 + body mass index ( $\text{kg}/\text{m}^2$ ).
